# Supplementary material
Source: PubMed Central journal article supplement (PMC3265874)

## SUPPLEMENTAL DATA

### EXPERIMENTAL PROCEDURES

**Analysis of RET endocytosis and recycling by fluorescence microscopy**-RET endocytosis and recycling were measured by immunofluorescence methods developed from our previous works (1,2). Briefly, Flag-tagged RET chimera and its mutants were constructed on the backbone of pcDNA3.1 vector and transfected into PC12 cells. To measure RET endocytosis, cells were incubated with Alexa-488-conjugated M1 anti-FLAG antibody for 30 minutes at 4 °C to selectively label FLAG-tagged receptors on the plasma membrane at the beginning of the experiment and then incubated at 37 °C for 30 minutes in the presence of ligand to drive receptor internalization. At the end of this incubation, cells were quickly washed 3 times with ice-cold PBS supplemented with 3 mM EDTA to dissociate fluorescent M1 antibody from residual cell surface receptors. Cells were then fixed with 4% paraformaldehyde, with the intracellular fluorescence representing the internalized receptors. In each experiment, two parallel control groups were included. In one control group, cells were fixed after a 30-minutes incubation in the absence of ligand and without EDTA stripping step (100% surface receptor control). In the other control group, cells were stripped immediately after the feeding step (0% Internalization control). Cells were examined by fluorescence microscopy by using appropriate filter sets to selectively detect Alexa-488, and staining intensities of each fluor in individual cells were integrated using MetaMorph software (Molecular Devices, Sunnyvale, CA). Receptor internalization level was

determined by the fluorescence ratio of internalization/surface receptors.

To quantify the extent of recycling observed after ligand removal in individual cells, after the similar feeding and ligand driven receptor internalization steps, transfected cells were quickly washed 3 times with ice-cold PBS/EDTA to dissociate FLAG antibody bound to the remaining receptors in the plasma membrane, thereby leaving fluorescent antibody bound only to the internalized pool of receptors. EDTA-stripped cells were then incubated at 37 °C for 45 minutes in the presence of Alexa-594-anti-mouse IgG to label all receptors that returned back to the cell surface, and then cells were fixed with 4% paraformaldehyde. For each receptor examined, two parallel control groups were included, one in which cells were fixed after a 30-minutes incubation in the absence of ligand and without EDTA stripping step (100% surface receptor control) and one in which cells were fixed immediately after the EDTA-mediated stripping step (0% recycled control). This analysis indicated that the efficiency of the EDTA strip (reduction of Alexa-594 staining intensity in the 0% recycled control relative to the 100% surface receptor control) was >95%. The percentage of receptors recycled in individual cells after ligand washout was then calculated from the red/green ratios determined from the control conditions according to the following formula  $(E-Z)/(C-Z) \times 100$ , where  $E$  is the mean ratio for the experimental group,  $Z$  is the mean ratio for the zero surface control, and  $C$  is the mean ratio for the 100% surface control.

### FIGURE LEGENDS

**Figure S1. RET and TrkB expression pattern in PC12 cells.** PC12 cell lysates were immunoblotted with RET and TrkB antibodies respectively. RET and TrkB levels in DRG extracts were set as a positive control and tubulin levels were determined as protein loading control.

**Figure S2. Thr<sup>675</sup> does not affect RET internalization and recycling.** (A) Ligand induced internalization of RET and RET-Thr<sup>675</sup> mutants were quantified. Flag-tagged RET chimera

and its Thr<sup>675</sup> mutants were constructed on the backbone of pcDNA3.1 vector and transfected into PC12 cells. The internalization levels of RET and RET-Thr<sup>675</sup> mutants were quantified by immunofluorescence methods described in EXPERIMENTAL PROCEDURES. (B) Recycling extent of Flag-tagged RET and RET-Thr<sup>675</sup> mutants were determined as described in EXPERIMENTAL PROCEDURES. (C) Cell surface levels of RET and RET-Thr<sup>675</sup> mutants were determined when receptor endocytosis was blocked. PC12 cells expressing GFP fused RET and RET-Thr<sup>675</sup> mutants were treated with dynasore for two hours and then receptor cell surface levels were quantified using ratiometric fluorescence assay. Relative receptor surface levels were normalized to that of RET-GFP in vehicle treated cells. In each experiment more than 30 cells were examined at random. The results are represented as mean  $\pm$  SEM from three independent experiments (\* $p$ <0.05 vs. RET surface level in the same group; one-way ANOVA).

## REFERENCES

1. Chen, Z. Y., Ieraci, A., Tanowitz, M., and Lee, F. S. (2005) *Mol Biol Cell* **16**, 5761-5772
2. Huang, S. H., Zhao, L., Sun, Z. P., Li, X. Z., Geng, Z., Zhang, K. D., Chao, M. V., and Chen, Z. Y. (2009) *J Biol Chem* **284**, 15126-15136

Figure S1

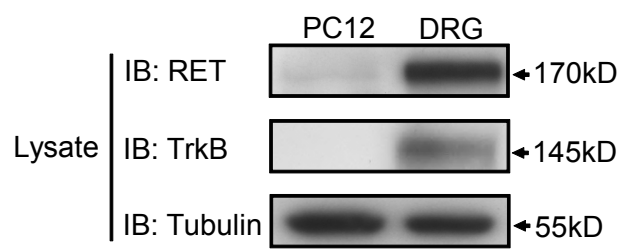

Figure S2

A

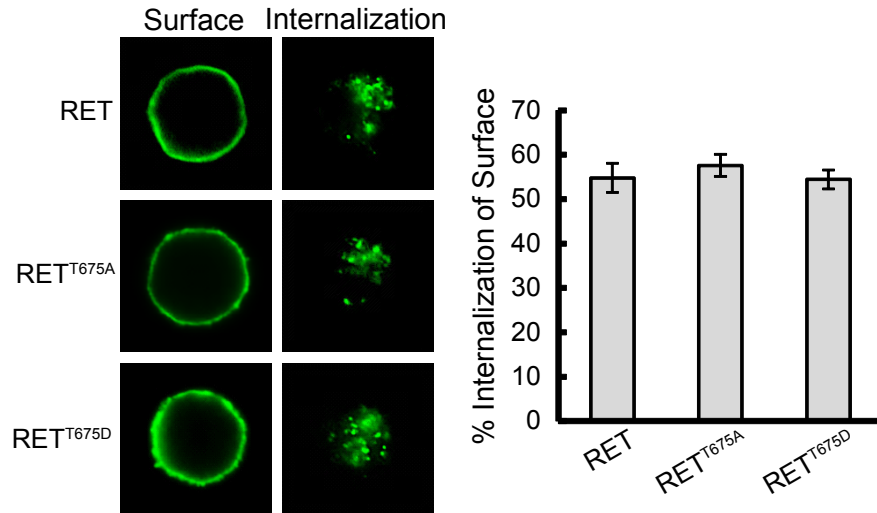

B

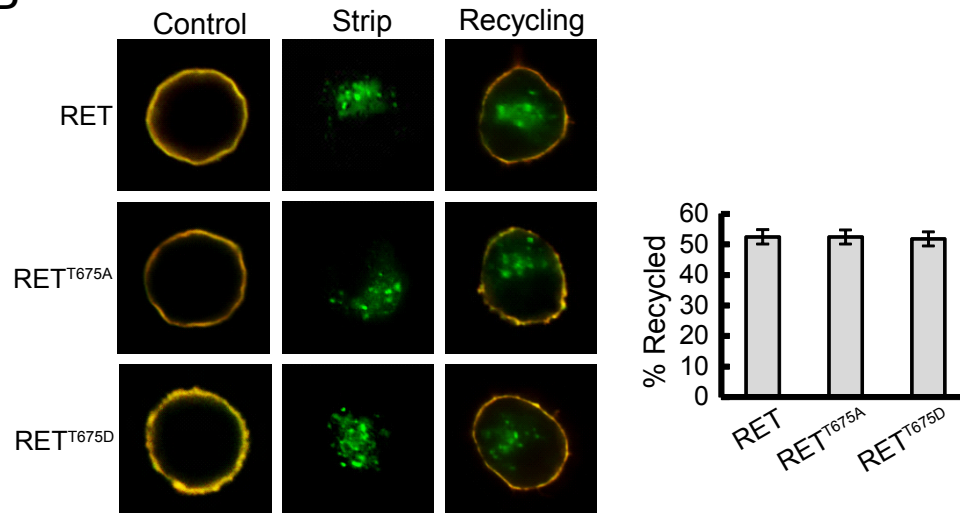

C

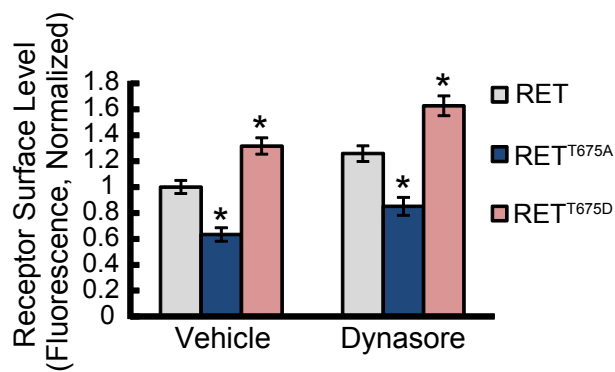

Supplement: supp_M111.283457_jbc.M111.283457-1.pdf [file supp_M111.283457_jbc.M111.283457-1.pdf]
